# Supplementary material for: Methyl methacrylate-modified polystyrene microspheres: an effective strategy to enhance the fluorescence of Eu-complexes
Source: Royal Society of Chemistry journal article supplement (doi:10.1039/d4cp01454e), 2024-01-01
Supplement: d4cp01454e1.pdf [file d4cp01454e1.pdf]

## Supporting Information

### **Methyl methacrylate-modified polystyrene microspheres: An effective strategy to enhance the fluorescence of Eu-complexes**

Yuwen Yuan <sup>a</sup>, Yunpeng Wang <sup>a</sup>, Pragati Awasthi <sup>a</sup>, Wenkun Dong <sup>b</sup>, Dong Chen <sup>b</sup>,

Xvsheng Qiao <sup>a, c\*</sup>, Zhiyu Wang <sup>a</sup>, Guodong Qian <sup>a</sup> and Xianping Fan <sup>a, d</sup>

<sup>a</sup> *State Key Laboratory of Silicon and Advanced Semiconductor Materials & School of Materials*

*Science and Engineering, Zhejiang University, Hangzhou 310058, China*

<sup>b</sup> *Assure Tech. (Hangzhou) Co., Ltd, Hangzhou 310015, China*

<sup>c</sup> *Longmen Laboratory of Luoyang, Luoyang 471000, China*

<sup>d</sup> *Ocean Academy, Zhejiang University, Zhoushan 316021, China*

\* Corresponding Author, E-mail: [qiaoxus@zju.edu.cn](mailto:qiaoxus@zju.edu.cn)

**Table S1** Different ratios of St and MMA

| St (g) | MMA(g) | H <sub>2</sub> O (mL) | APS (g) | SDS (g) |
|--------|--------|-----------------------|---------|---------|
| 4.5    | 0.5    | 45                    | 0.20    | 0.25    |
| 3.5    | 1.5    | 45                    | 0.20    | 0.25    |
| 2.5    | 2.5    | 45                    | 0.20    | 0.25    |
| 3.5    | 1.5    | 45                    | 0.20    | 0.25    |

**Table S2** Microspheres with different sodium methacrylate contents

| St (g) | MMA (g) | H <sub>2</sub> O (mL) | APS (g) | Sodium methacrylate | SDS (g) |
|--------|---------|-----------------------|---------|---------------------|---------|
| 3.5    | 1.5     | 45                    | 0.20    | 1%mol               | 0.25    |
| 3.5    | 1.5     | 45                    | 0.20    | 2%mol               | 0.25    |
| 3.5    | 1.5     | 45                    | 0.20    | 3%mol               | 0.25    |
| 3.5    | 1.5     | 45                    | 0.20    | 4%mol               | 0.25    |

**Table S3** Analysis data comparison among PS-Eu, PSMMA-Eu and commercial microspheres

| Samples                 | m <sub>0</sub> (g) | V <sub>0</sub> (mL) | Test Elements | Element concentration of test solution (mg/L) | Sample element content (mg/kg) | W (%) |
|-------------------------|--------------------|---------------------|---------------|-----------------------------------------------|--------------------------------|-------|
| PSMMA-Eu                | 0.0559             | 50                  | P             | 0.646                                         | 578.10                         | 0.06  |
|                         | 0.0559             | 50                  | P             | 0.639                                         | 571.30                         | 0.06  |
|                         | 0.0559             | 50                  | Eu            | 6.602                                         | 5905.89                        | 0.59  |
|                         | 0.0559             | 50                  | Eu            | 6.611                                         | 5914.12                        | 0.59  |
| PS-Eu                   | 0.0548             | 50                  | P             | 0.320                                         | 292.28                         | 0.03  |
|                         | 0.0548             | 50                  | P             | 0.340                                         | 309.80                         | 0.03  |
|                         | 0.0548             | 50                  | Eu            | 0.841                                         | 767.20                         | 0.08  |
| Commercial microspheres | 0.0548             | 50                  | Eu            | 0.855                                         | 780.33                         | 0.08  |
|                         | 0.0551             | 50                  | P             | 0.046                                         | 41.17                          | 0.004 |
|                         | 0.0551             | 50                  | P             | 0.047                                         | 422.03                         | 0.004 |
|                         | 0.0551             | 50                  | Eu            | 1.582                                         | 1342.02                        | 0.13  |
|                         | 0.0551             | 50                  | Eu            | 1.564                                         | 1399.46                        | 0.14  |

**Table S4** Quantitative detection of LFIA based on PSMMA- Eu

| Samples  | ng/mL | T     | T-AV  | C     | C-AV   | T/C    | T/C-AV | T/C-CV |
|----------|-------|-------|-------|-------|--------|--------|--------|--------|
| PSMMA-Eu | 0     | 27180 |       | 28976 |        | 0.9380 |        |        |
|          |       | 25686 |       | 27551 |        | 0.9323 |        |        |
|          |       | 26575 | 28088 | 27833 | 29626  | 0.9548 | 0.947  | 1.33%  |
|          |       | 29647 |       | 31385 |        | 0.9446 |        |        |
|          |       | 31352 |       | 32388 |        | 0.9680 |        |        |
|          |       | 14143 |       | 34374 |        | 0.4114 |        |        |
|          | 0.5   | 12480 |       | 31396 |        | 0.3975 |        |        |
|          |       | 12177 | 13635 | 32916 | 34957  | 0.3699 | 0.390  | 8.62%  |
|          |       | 16605 |       | 38817 |        | 0.4272 |        |        |
|          |       | 12768 |       | 37227 |        | 0.3430 |        |        |
|          |       | 7972  |       | 34892 |        | 0.2285 |        |        |
|          |       | 11017 |       | 42104 |        | 0.2617 |        |        |
|          | 1     | 8329  | 9114  | 34448 | 37832  | 0.2418 | 0.240  | 5.37%  |
|          |       | 8795  |       | 37044 |        | 0.2374 |        |        |
|          |       | 9456  |       | 40673 |        | 0.2325 |        |        |
|          |       | 3902  |       | 37921 |        | 0.0982 |        |        |
|          |       | 3719  |       | 39770 |        | 0.0934 |        |        |
|          |       | 3898  | 3945  | 45284 | 42425  | 0.0861 | 0.093  | 7.46%  |
|          | 5     | 3554  |       | 41366 |        | 0.0859 |        |        |
|          |       | 4653  |       | 45984 |        | 0.1012 |        |        |
|          |       | 2890  |       | 52377 |        | 0.0552 |        |        |
|          |       | 2942  |       | 44204 |        | 0.0666 |        |        |
|          |       | 2841  | 2786  | 47490 | 46504  | 0.0598 | 0.060  | 6.84%  |
|          |       | 2635  |       | 43929 |        | 0.0600 |        |        |
|          | 10    | 2621  |       | 44519 |        | 0.0589 |        |        |
|          |       | 2165  |       | 48036 |        | 0.0451 |        |        |
|          |       | 1995  |       | 49950 |        | 0.0399 |        |        |
|          |       | 1567  | 1809  | 39560 | 44943  | 0.0396 | 0.040  | 7.16%  |
|          |       | 1806  |       | 47348 |        | 0.0381 |        |        |
|          |       | 1514  |       | 39819 |        | 0.0380 |        |        |
|          | 20    | 906   |       | 47946 |        | 0.0189 |        |        |
|          |       | 839   |       | 44174 |        | 0.0190 |        |        |
|          |       | 1296  | 991   | 48706 | 46341  | 0.0266 | 0.021  | 15.96% |
|          |       | 896   |       | 46603 |        | 0.0192 |        |        |
|          |       | 1016  |       | 44277 |        | 0.0230 |        |        |
|          |       | 553   |       | 49670 |        | 0.111  |        |        |
| 50       | 668   |       | 48189 |       | 0.0139 |        |        |        |
|          | 614   | 619   | 45870 | 49621 | 0.0134 | 0.013  | 8.81%  |        |
|          | 664   |       | 55189 |       | 0.0120 |        |        |        |
|          | 598   |       | 49189 |       | 0.0121 |        |        |        |

**Table S5** Comparison between the detection limits (LODs) of LFIA (lateral flow immunoassay) based on fluorescent PSMMA-Eu and commercial microspheres.

| Method                                | LOD (ng/ mL) |
|---------------------------------------|--------------|
| LFIA based on fluorescent PSMMA-Eu    | 0.10         |
| LFIA based on commercial microspheres | 1.00         |

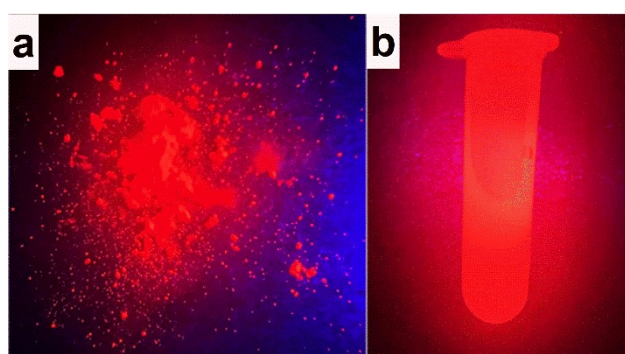

**Fig. S1** Photographs of (a) Eu (TTA)<sub>3</sub>(TPPO)<sub>2</sub> and (b) PSMMA-Eu under 365nm irradiation.

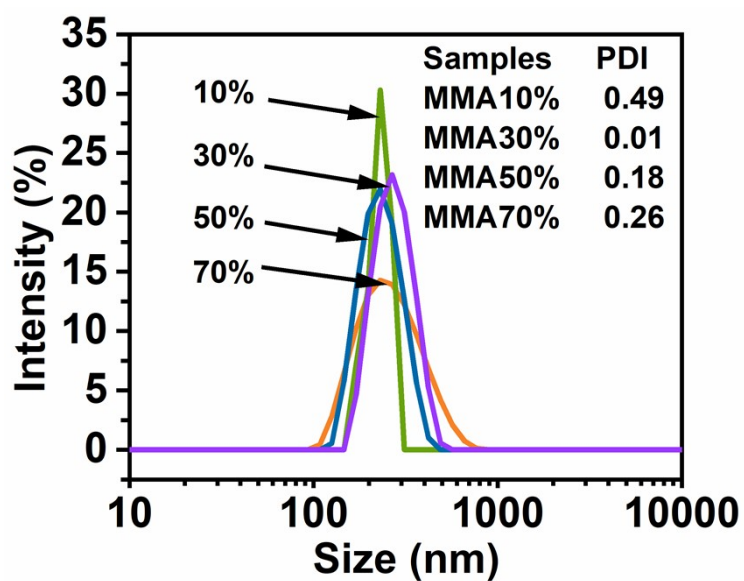

**Fig. S2** DLS images of PSMMA-Eu microsphere with different ratios of MMA

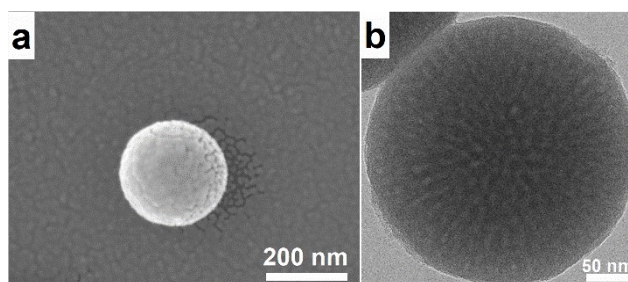

**Fig. S3** Enlarged SEM(a) and HRTEM(b) of a single fluorescent microsphere of PSMMA

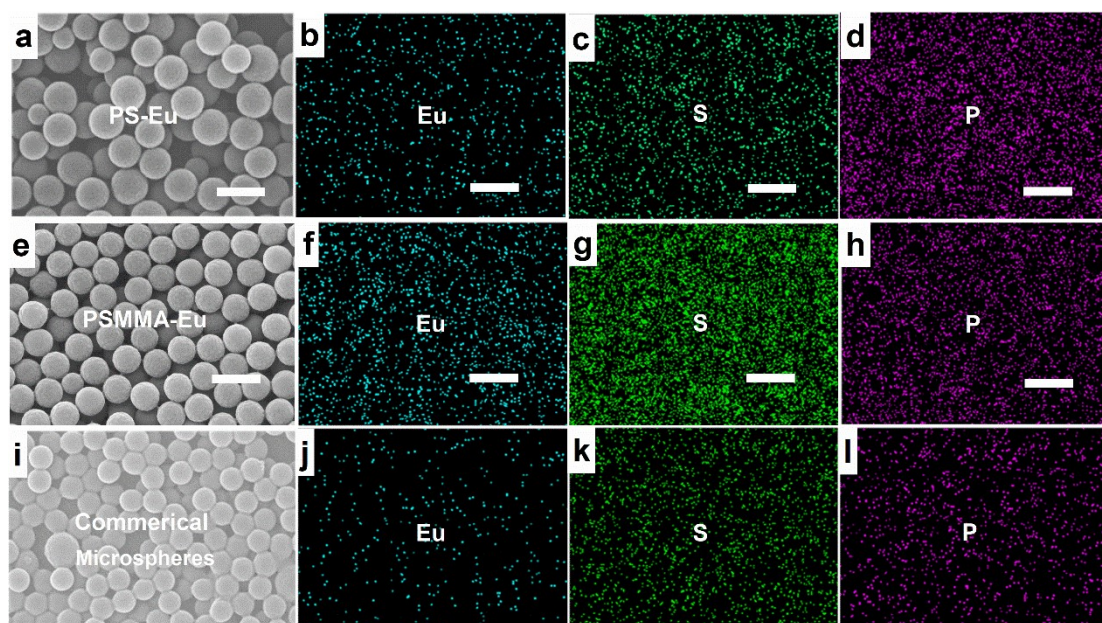

**Fig. S4** Element distribution scanning map of PS-Eu(a-d), PAMMA-Eu(e-h) and commercial microspheres (i-l) (Scale bar = 500nm)

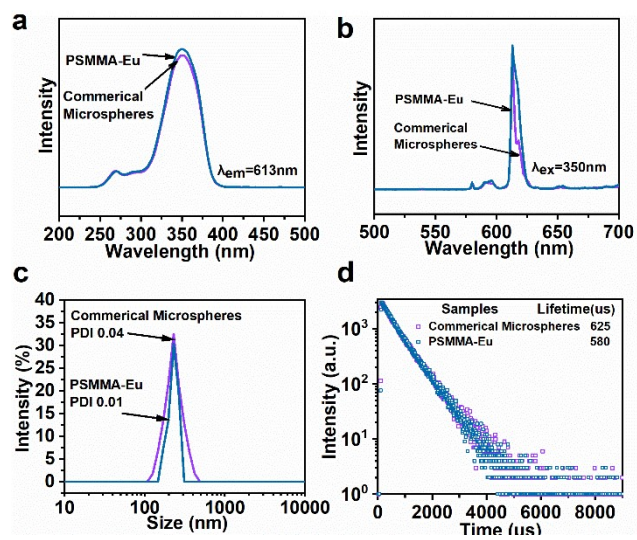

**Fig. S5** (a-b) Emission and excitation spectra, (c) DLS images and (d) Fluorescence attenuation spectra of PSMMA-Eu and commercial microspheres.
